# Supplementary material for: Revealing New Candidate Genes for Teat Number Relevant Traits in Duroc Pigs Using Genome-Wide Association Studies
Source: MDPI journal article supplement (doi:10.3390/ani11030806), 2021-03-13
Supplement: s1 [file s1]

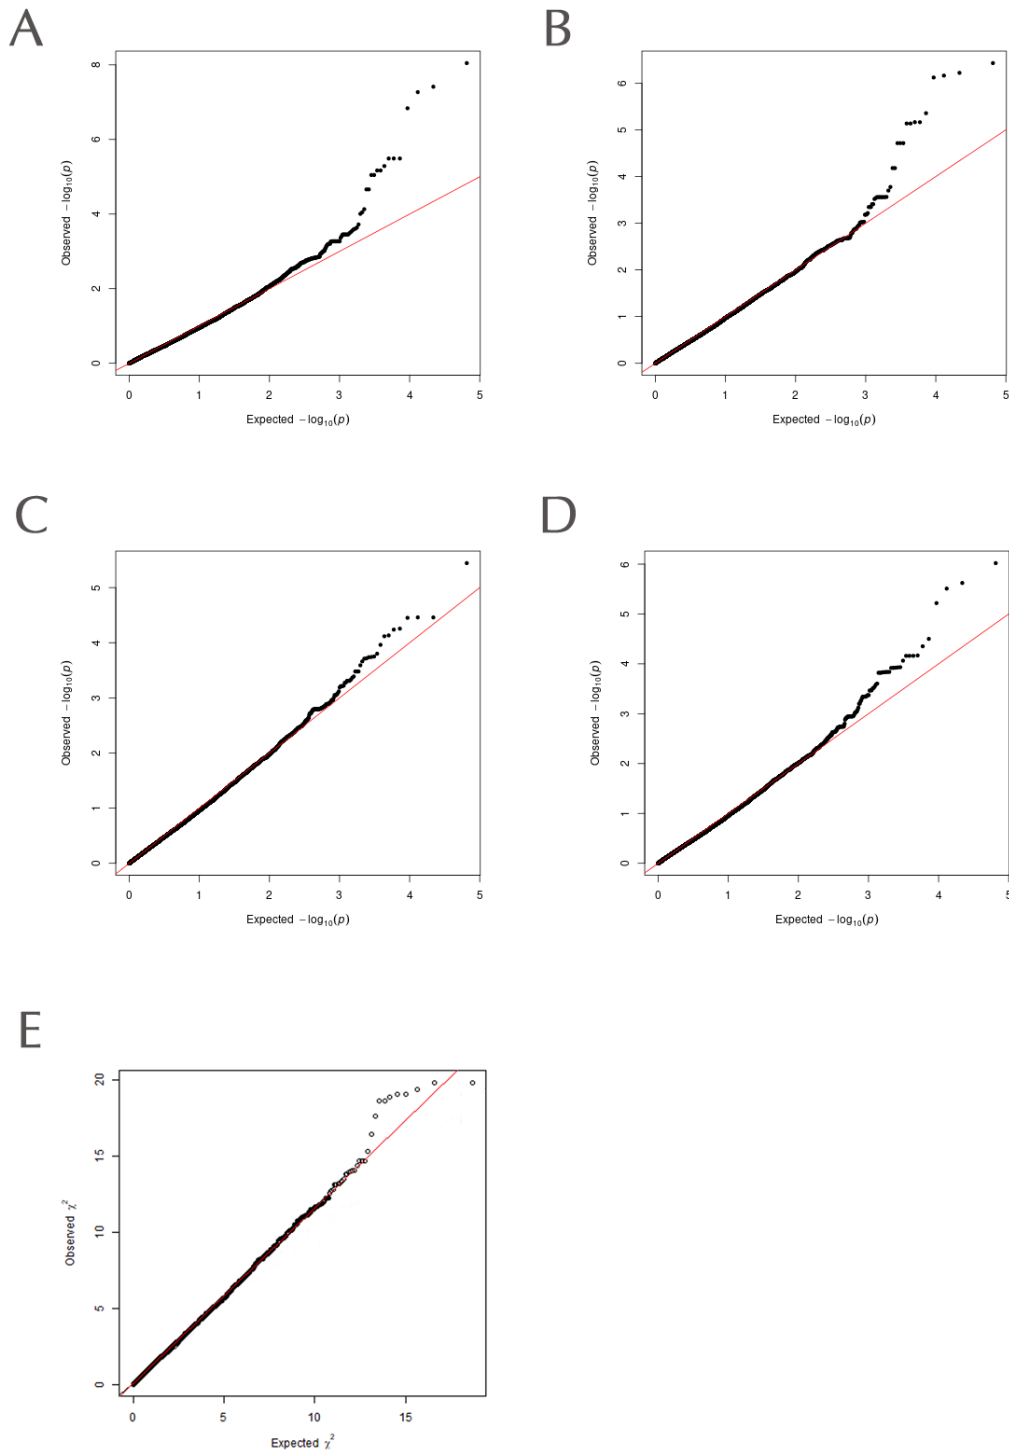

**Figure S1.** A, B, C, D and E were the Q-Q plot of total teat numbers, right teat numbers, left teat numbers, maximum number of teats on a side and symmetry between left and right teat numbers. The Q-Q plots of A, B, C and D show the observed  $-\log_{10}$  transformed  $p$ -values (y-axis) and the expected  $-\log_{10}$  transformed  $p$ -values (x-axis). The Q-Q plots of E show the observed  $\chi^2$  transformed  $p$ -values (y-axis) and the expected  $\chi^2$  transformed  $p$ -values (x-axis)
